# Supplementary material for: Self-polymerization of dopamine and polyethyleneimine: novel fluorescent organic nanoprobes for biological imaging applications
Source: Royal Society of Chemistry journal article supplement (doi:10.1039/c4tb02067g), 2015-01-01
Supplement: c4tb02067g1.pdf [file c4tb02067g1.pdf]

## Supporting information

Self-polymerization of Dopamine and Polyethyleneimine: Novel Fluorescent Organic Nanoprobes for Biological Imaging Applications

Meiying Liu<sup>a</sup>, Jinzhao Ji<sup>b</sup>, Xiaoyong Zhang<sup>a, b, \*</sup>, Xiqi Zhang<sup>b</sup>, Bin Yang<sup>b</sup>, Fengjie Deng<sup>a</sup>, Zhen Li<sup>b</sup>, Ke Wang<sup>b</sup>, Yang Yang<sup>b</sup>, Yen Wei<sup>b, \*</sup>

<sup>a</sup> Department of Chemistry/Institute of Polymers, Nanchang University, 999 Xuefu Avenue, Nanchang 330031, China. <sup>b</sup> Department of Chemistry and the Tsinghua Center for Frontier Polymer Research, Tsinghua University, Beijing, 100084, P. R. China.

Xiaoyong zhang

Email: [xiaoyongzhang1980@gmail.com](mailto:xiaoyongzhang1980@gmail.com);

Yen Wei

Email: [weiyen@tsinghua.edu.cn](mailto:weiyen@tsinghua.edu.cn)

## Results

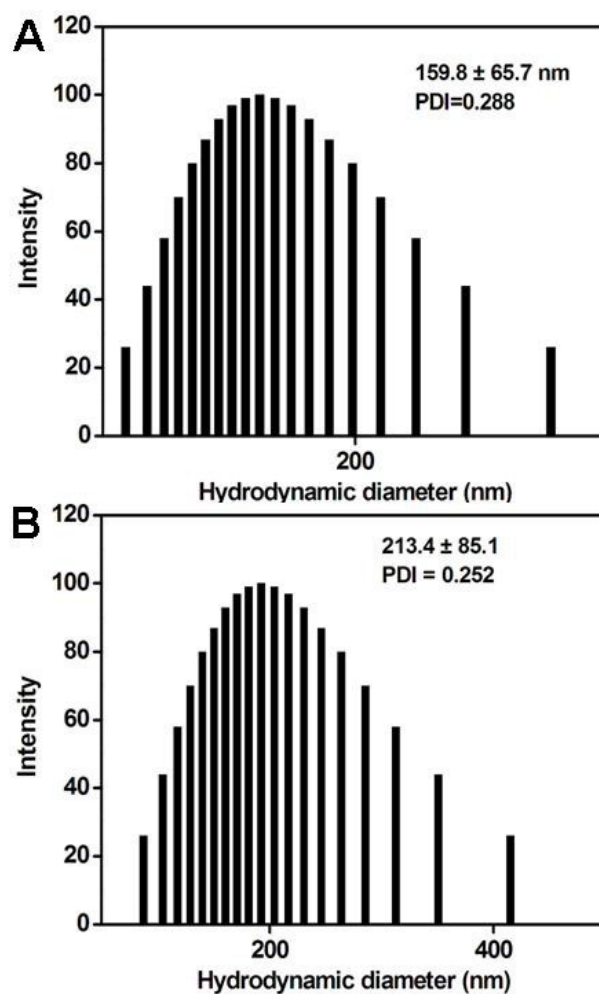

**Fig. S1** Hydrodynamic size distribution of **PEI-PDA** FONs in (A) H<sub>2</sub>O and (B) PBS.

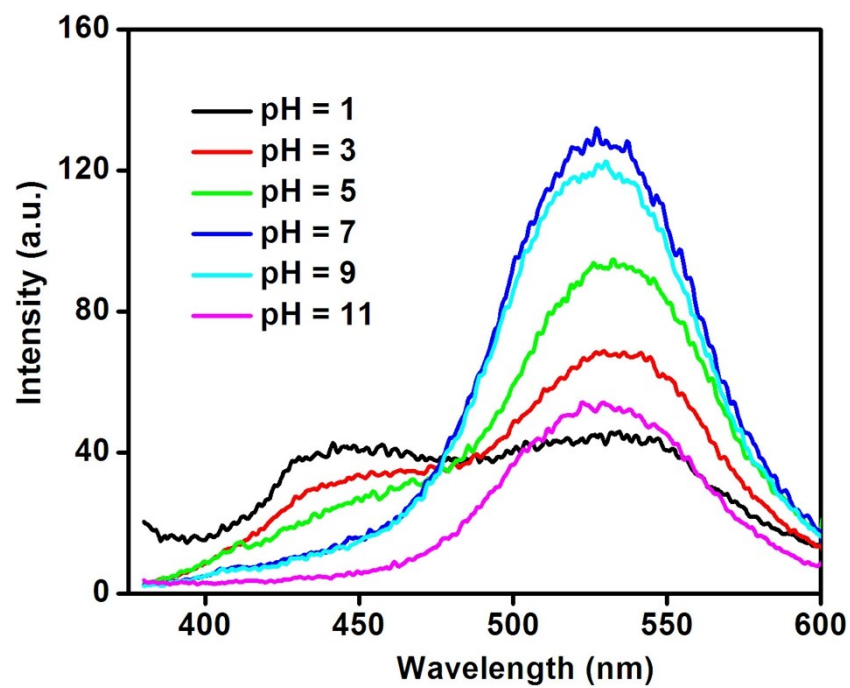

**Fig. S2** Effect of pH values on the fluorescent properties of **PEI-PDA** FONs. The excitation wavelength is fixed at 360 nm.

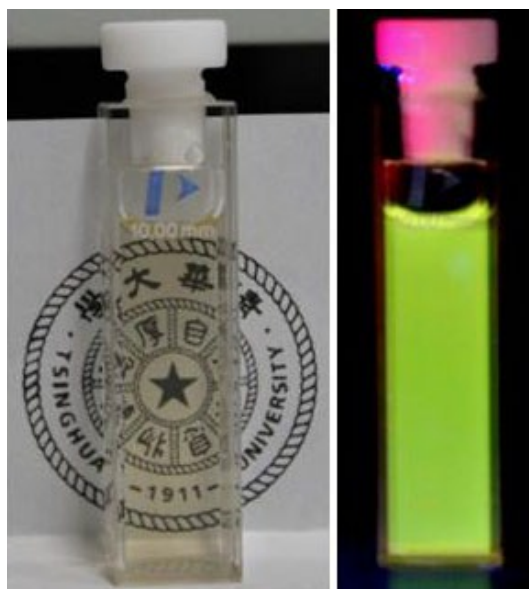

**Fig. S3** Optical images of **PEI-PDA** FONs water dispersion for more than one week (left bottle). The right bottle is the optical images of **PEI-PDA** FONs in water under UV lamp ( $\lambda = 365$  nm).

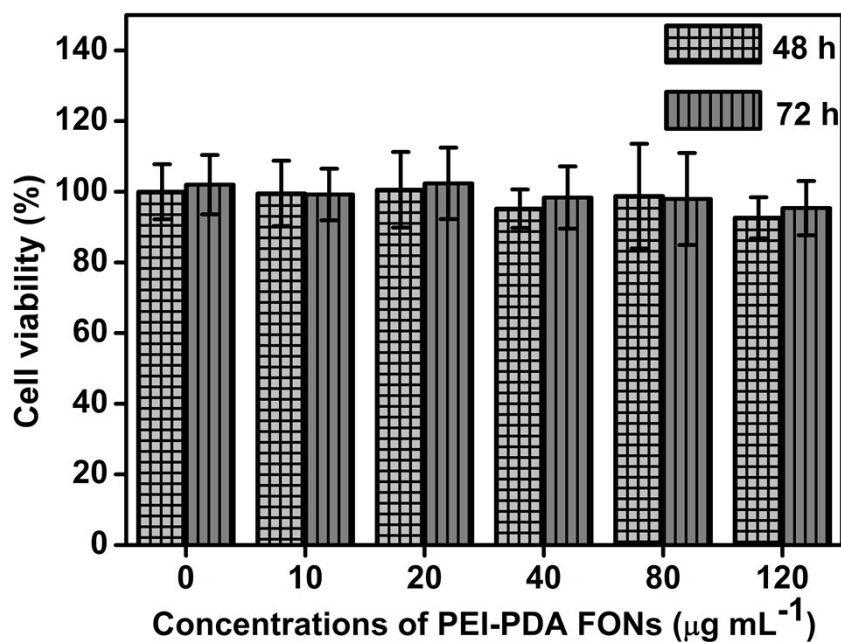

**Fig. S4** Cell viability of **PEI-PDA** FONs with A549 cells (the concentrations of **PEI-PDA** FONs are ranged from 10-120  $\mu\text{g mL}^{-1}$ ) for 48 and 72 h.
